# Supplementary material
Source: PubMed Central journal article supplement (PMC5381156)
Supplement: NIHMS852979-supplement-supplement_1.pdf [file NIHMS852979-supplement-supplement_1.pdf]

## Supplementary Figure 1

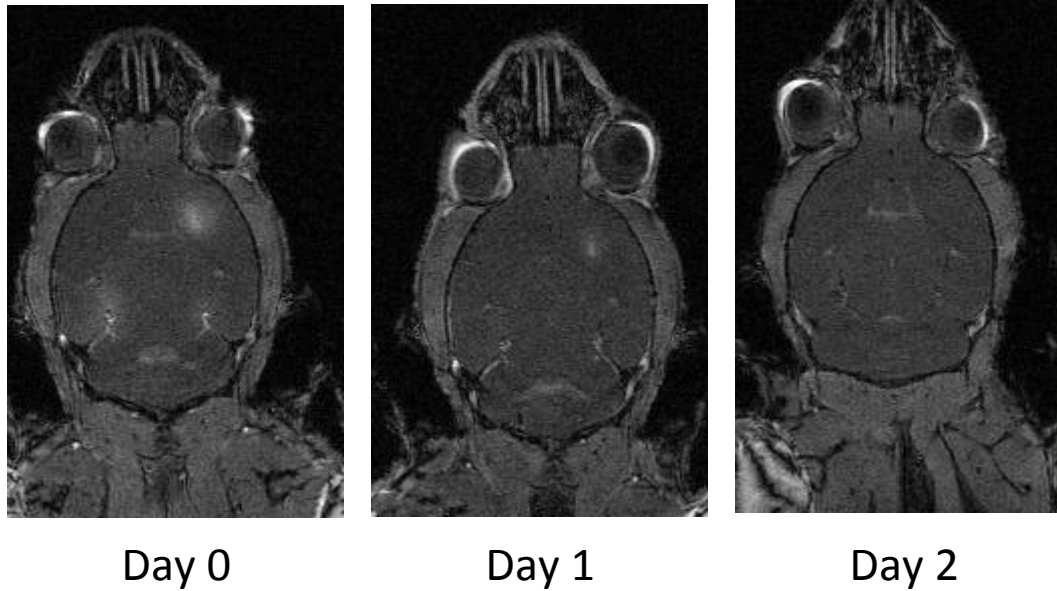

Caption: BBB is closed on day 2 under the ultrasound parameters used in this study (0.45 MPa).
